# Supplementary material
Source: MDPI journal article supplement (https://www.mdpi.com/2075-163X/13/5/661)
Supplement: s1 [file s1]

# Supplementary Materials: Geochemical Characterization of Rock Samples from Selected Fiji Mine Sites to Evaluate on-Site Environmental Vulnerabilities

## Summary

This supplementary information provides additional information on rock types, quality assurance, and quality control (QA/QC) protocols, microscopic observation, X-ray powder diffraction (XRD) percentages abundance for each mineral, leachate characteristics, saturation indices, and the principal component analysis (PCA) graph.

**Table S1.** Rock sample details.

**Table S2.** Quality assurance (QA) and quality control (QC).

**Figure S1.** Microscopic observation of rock samples M2, N1,T3, V1, V4, and W1.

**Table S3.** XRD diffraction percentage mineralogical abundances (%) of the rock samples.

**Table S4.** The EC, Eh, ORP, pe, and mean concentrations of co-existing elements, Al, Na, and Si, of the rock samples.

**Table S5.** Saturation indices (SIs) of selected mineral phases in the leachates of the rock samples.

**Figure S2.** Graphical presentation of the PCA showing the first 3 components with significant inter-correlated dependent variables.

**Table S1.** Rock sample details.

| Mine Site | Rock Samples and Rock Type                                                                                      | Deposit Type                                                             | Site Condition                          |
|-----------|-----------------------------------------------------------------------------------------------------------------|--------------------------------------------------------------------------|-----------------------------------------|
| Mt Kasi   | Three samples; M1 – volcanic breccia, M2 – silicified ore, M3 – andesitic rock                                  | High-sulfidation epithermal vein                                         | Abandoned but under further exploration |
| Nukudamu  | Four samples; N1, N2 – oxidized andesitic rock, N3 – oxidized obsidian rock, N4 – pyritic pumice                | Kuroko                                                                   | Completely abandoned                    |
| Tuvatu    | Four samples; T1 – andesite, T2 – biotite, T3 – micro monazite, T4 – mod blended monzonite                      | Low-sulfidation epithermal gold vein                                     | Active mining lease, development stage  |
| Vatukoula | Four samples; V1 – aphanitic basalt, V2 – porphyritic andesite, V3 – basalt, V4 medium coarse grained monzonite | Low-sulfidation, epithermal gold veins, porphyry Cu-style mineralization | Active mining lease, full operation     |
| Wainivesi | One composite sample; W1 – silicified andesites, pyritic andesite and dacitic ore                               | Volcanic massive sulfidation vein                                        | Active and under exploration license    |

**Table S2.** Quality assurance (QA) and quality control (QC).

| Calibration Standard for ICP-AES                            |                                                                                                                                                                                      |             |                |       |        |        |                                        |       |                  |           |
|-------------------------------------------------------------|--------------------------------------------------------------------------------------------------------------------------------------------------------------------------------------|-------------|----------------|-------|--------|--------|----------------------------------------|-------|------------------|-----------|
| Mass concentration (w/v) ± expanded measurement uncertainty |                                                                                                                                                                                      |             |                |       |        |        |                                        |       |                  |           |
| Elements                                                    | Certified value (mg/L)                                                                                                                                                               | Uncertainty | Measured value |       |        |        |                                        |       | Traceable to SRM |           |
|                                                             |                                                                                                                                                                                      |             | Multi Standard |       |        |        | SO <sub>4</sub> <sup>2-</sup> Standard |       |                  |           |
|                                                             |                                                                                                                                                                                      |             | Std 1          | Std 5 | Std 10 | Std 20 | Std 1                                  | Std 5 |                  | Std 10    |
| Ca                                                          | 1009                                                                                                                                                                                 | ±10         | 1002           | 996   | 992    | 1005   |                                        |       |                  | SRM 3109a |
| Cu                                                          | 998                                                                                                                                                                                  | ±10         | 970            | 1002  | 1002   | 997    |                                        |       |                  | SRM 3114a |
| Fe                                                          | 998                                                                                                                                                                                  | ±10         | 996            | 992   | 989    | 1002   |                                        |       |                  | SRM 3126a |
| Mg                                                          | 999                                                                                                                                                                                  | ±10         | 985            | 982   | 995    | 993    |                                        |       |                  | SRM 3131a |
| Na                                                          | 1001                                                                                                                                                                                 | ±10         |                |       |        |        |                                        |       |                  | SRM 3152a |
| K                                                           | 1002                                                                                                                                                                                 | ±10         | 1010           | 1004  | 1000   | 1005   |                                        |       |                  | SRM 3141a |
| Pb                                                          | 999                                                                                                                                                                                  | ±10         | 987            | 980   | 979    | 990    |                                        |       |                  | SRM 3128  |
| Zn                                                          | 997                                                                                                                                                                                  | ±10         | 978            | 982   | 986    | 1015   |                                        |       |                  | SRM 3168a |
|                                                             | 1000                                                                                                                                                                                 |             |                |       |        |        | 1020                                   | 996   | 1005             |           |
| SO <sub>4</sub> <sup>2-</sup>                               | 0.8% (coverage factor <i>k</i> =2 level of confidence approximately 95% (sulfate ion standard solution SO <sub>4</sub> <sup>2-</sup> 1,000) (ISO/IEC 17025:2017 and ISO 17034:2018)) |             |                |       |        |        |                                        |       |                  |           |

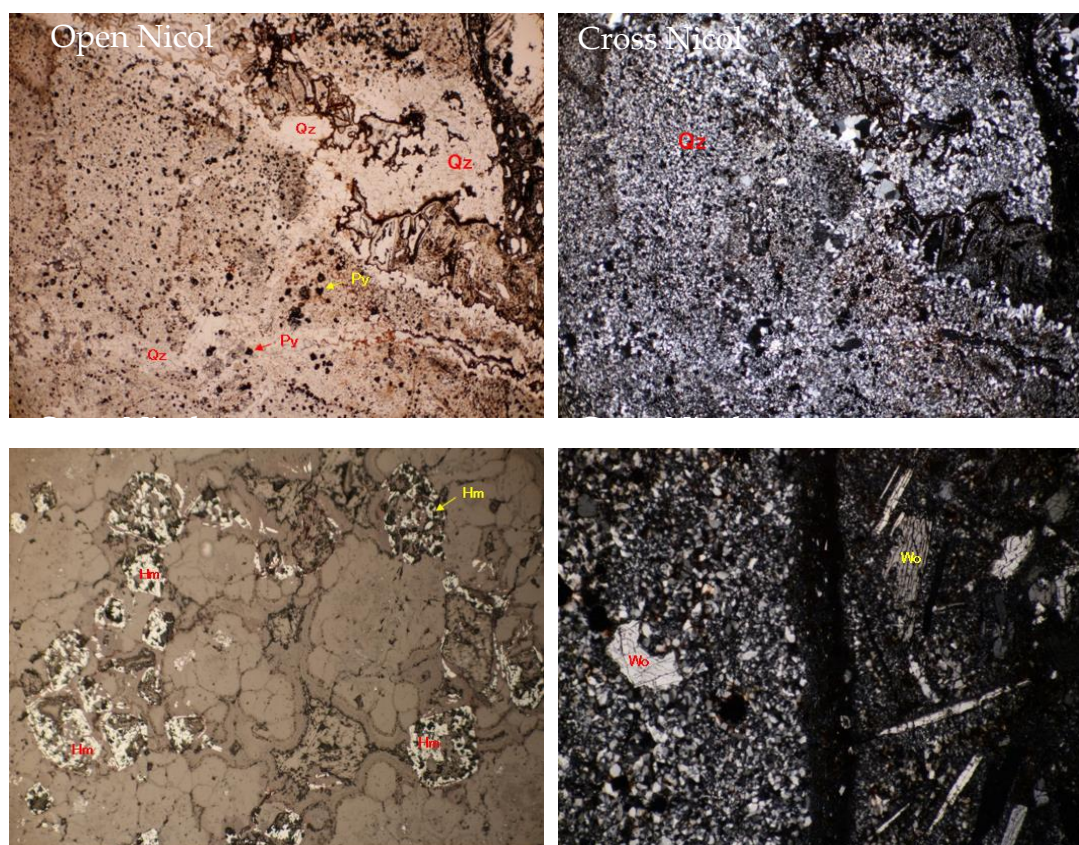

(a) M2—Qz: quartz, Py: pyritic minerals, Hm: hematite, and Wo: wollastonite.



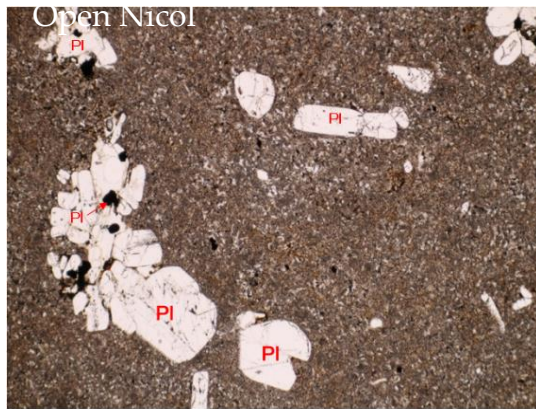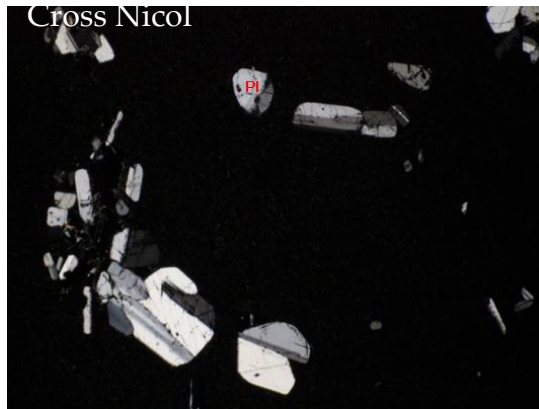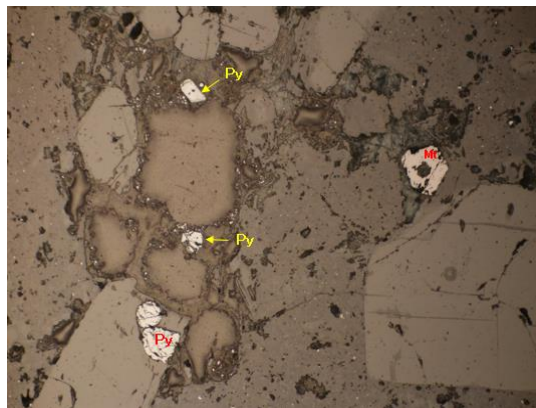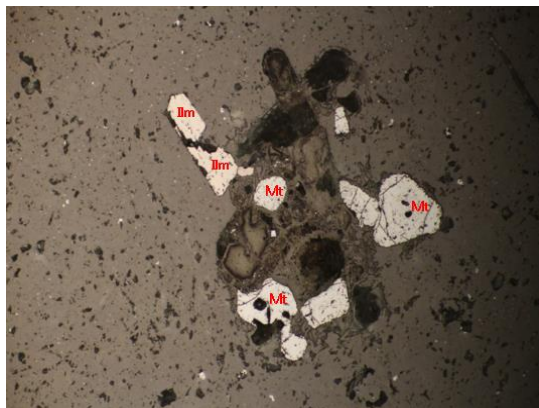

(b) N1—Pl: plagioclase, Py: pyritic minerals, Mt: magnetite, and Ilm: ilmenite.

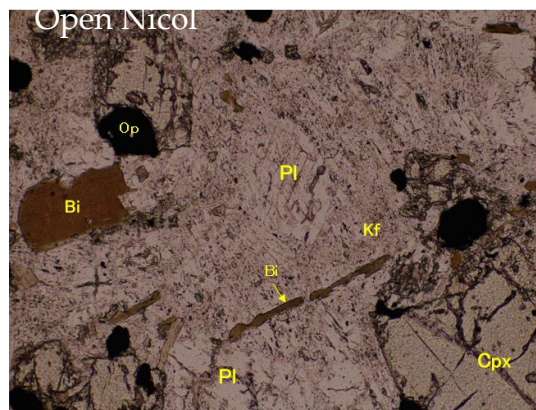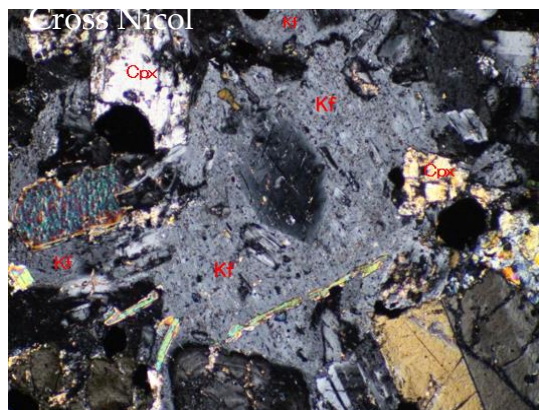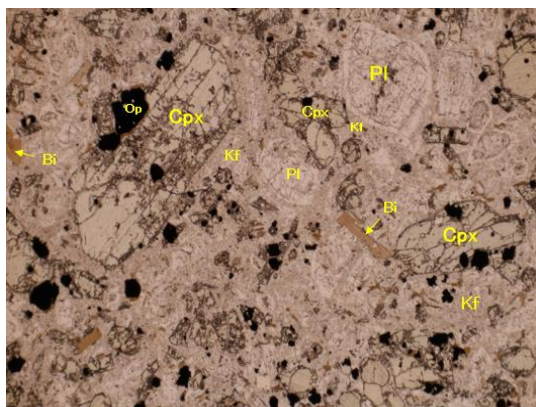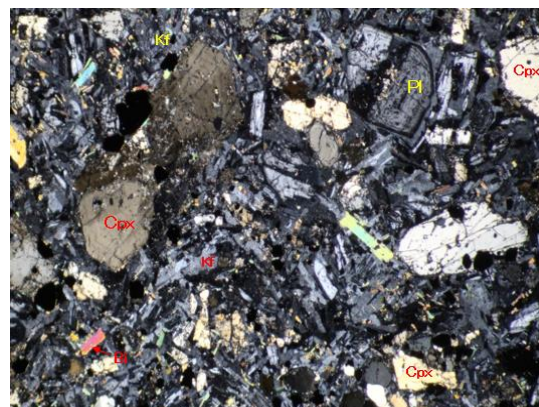

(c) T3—Bi: bismuth, Pl: plagioclase, Op: opaque minerals, Kf: potassium feldspar, Cpx: clinopyroxene, Mt: magnetite, Py: pyritic minerals, and Bi: biotite.



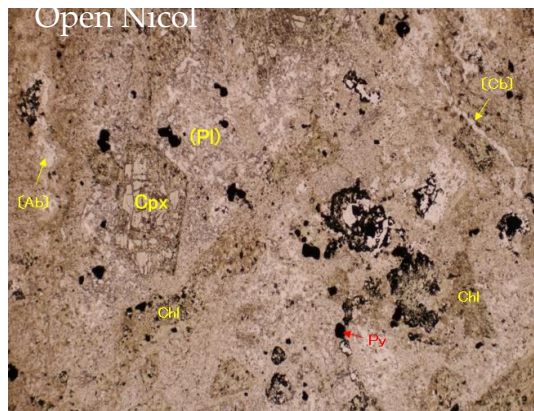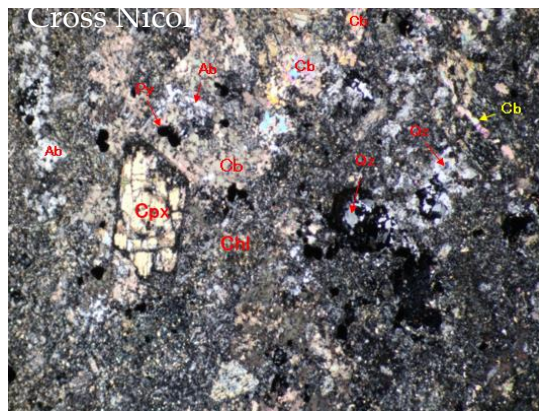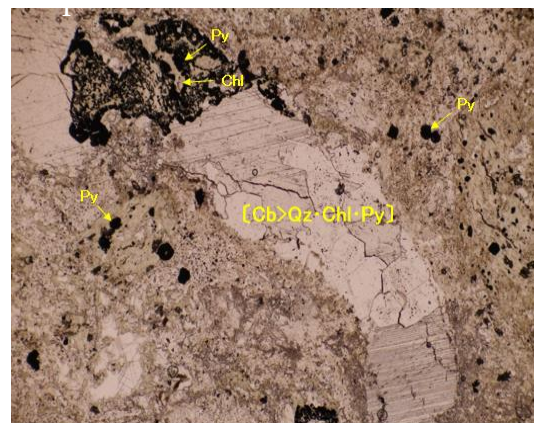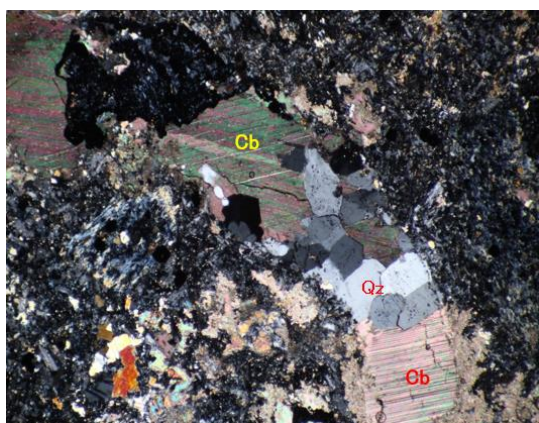

(d) V1—Ab: albite, Pl: plagioclase, Cpx: clinoaugite, Opx: orthopyroxene, Py: pyritic minerals, Cb: carbonate minerals, Chl: chlorite, Qz: quartz, and Mt: magnetite.

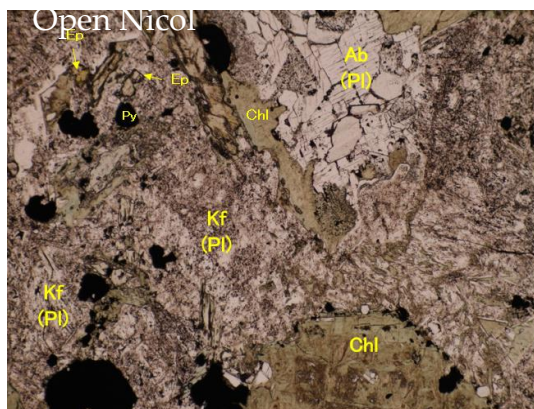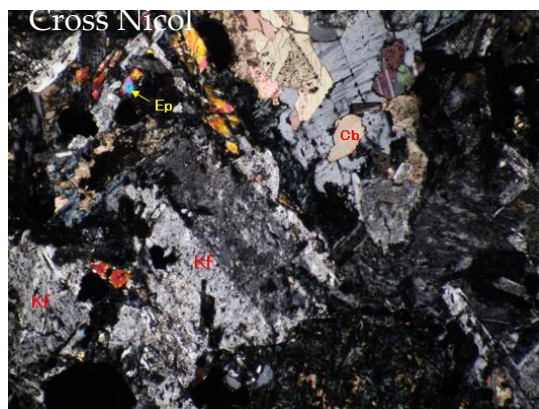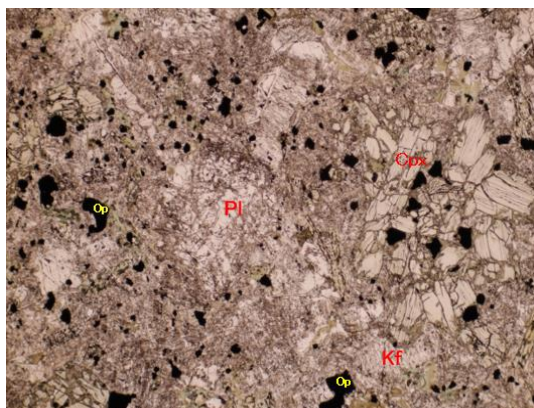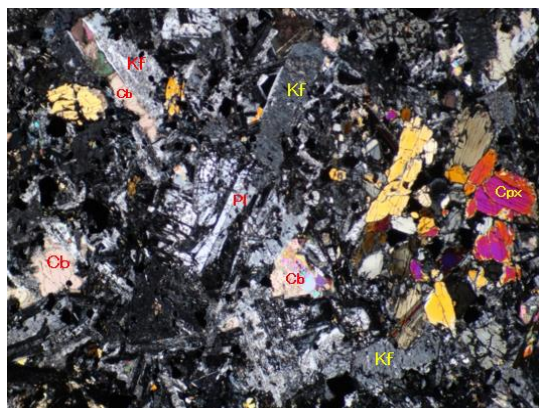



(e) V4—Ep: epidote, Py: pyritic minerals, Kf: potassium feldspar, Ab: albite, Pl: plagioclase, Chl: chlorite, Cb: carbonate minerals, Op: opaque minerals, and Cpx: clinopyroxene.

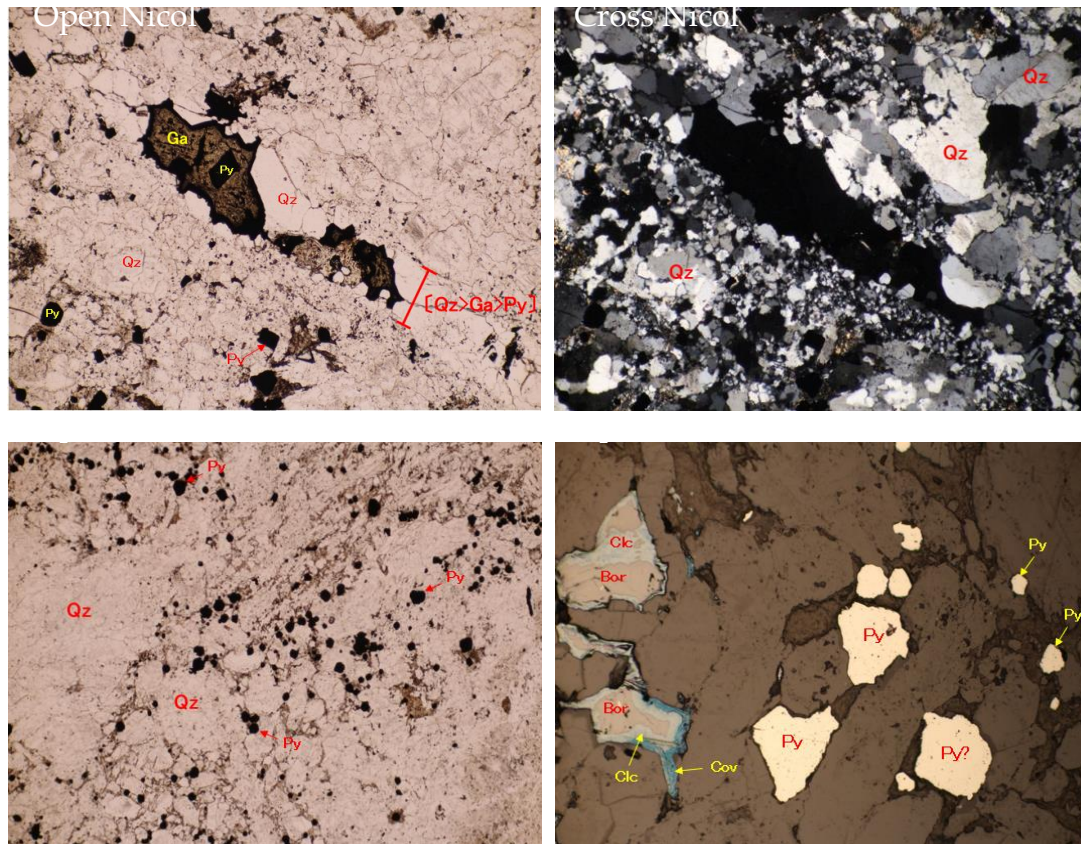

(f) W1—Ga: gallium, Qz: quartz, and Py: pyritic minerals.

**Figure S1.** Microscopic observation of rock samples M2, N1, T3, V1, V4, and W1, under open and cross Nicol.

**Table S3.** XRD diffraction percentage mineralogical abundances (%) of the rock samples.

| Sample / Mineral | M1   | M2   | M3   | N1   | N2   | N3   | N4   | T1   | T2   | T3   | T4    | V1   | V2   | V3   | V4   | W1   |
|------------------|------|------|------|------|------|------|------|------|------|------|-------|------|------|------|------|------|
| Quartz           | 77.5 | 85.9 | 87.6 | 13.8 | 6.4  | 58.8 | -    | 23.7 | 14.6 | -    | 12.3  | 23.2 | 9.8  | 23.7 | 17.2 | 30.8 |
| Nacrite          | 17.5 | 11.9 | 8.9  | -    | -    | -    | 2.4  | -    | -    | -    | -     | 14.8 | -    | 19.2 | -    | -    |
| Augite           | -    | -    | -    | -    | -    | -    | -    | 16.0 | 46.9 | 21.3 | 2.2   | 35.9 | 20.5 | -    | -    | -    |
| Pyrite           | 5.0  | -    | 3.5  | -    | 4.3  | -    | 94.6 | -    | -    | -    | -     | -    | -    | -    | -    | 7.7  |
| Anorthite        | -    | -    | -    | -    | -    | -    | -    | 64.6 | 32.0 | 48.8 | 54.8  | -    | -    | -    | 37.3 | -    |
| Orthoclase       | -    | -    | -    | -    | -    | -    | -    | -    | -    | 25.2 | 30.93 | -    | 44.1 | -    | 41.2 | -    |
| Calcite          | -    | -    | -    | -    | -    | -    | -    | 8.8  | -    | -    | -     | 26.1 | 22.7 | 17.3 | -    | -    |
| Goethite         | -    | -    | -    | -    | 8.9  | 34.3 | -    | -    | -    | -    | -     | -    | -    | -    | -    | -    |
| Albite           | -    | -    | -    | 47.5 | -    | -    | 3.0  | -    | -    | -    | -     | -    | -    | -    | -    | -    |
| Cristobalite     | -    | -    | -    | 38.7 | -    | -    | -    | -    | -    | -    | -     | -    | -    | -    | -    | -    |
| Chalcopyrite     | -    | -    | -    | -    | 2.0  | -    | -    | -    | -    | -    | -     | -    | -    | -    | -    | 6.3  |
| Hematite         | -    | -    | -    | -    | 72.4 | 4.6  | -    | -    | -    | -    | -     | -    | -    | -    | -    | -    |
| Dolomite         | -    | -    | -    | -    | -    | -    | -    | -    | -    | 3.4  | -     | -    | -    | -    | 4.3  | -    |
